# Supplementary material for: E2 superfamily of ubiquitin-conjugating enzymes: constitutively active or activated through phosphorylation in the catalytic cleft
Source: PubMed Central journal article supplement (PMC4604453; doi:10.1038/srep14849), 2015-10-14

## Supplementary Information

# **E2 superfamily of ubiquitin-conjugating enzymes: constitutively active or activated through phosphorylation in the catalytic cleft**

**Ilaria Valimberti<sup>1</sup>, Matteo Tiberti<sup>1</sup>, Matteo Lambrughì<sup>1</sup>, Boris Sarcevic<sup>2</sup>, Elena Papaleo<sup>1\*‡</sup>**

<sup>1</sup>Department of Biotechnology and Biosciences, University of Milano-Bicocca, Piazza della Scienza 2, 20126, Milan (Italy) <sup>2</sup>Cell Cycle and Cancer Unit, St. Vincent's Institute of Medical Research and The Department of Medicine, St. Vincent's Hospital, The University of Melbourne, Fitzroy, Melbourne, Victoria 3065, Australia

\* To whom correspondence should be addressed. Email: elena.papaleo@unimib.it, elena.papaleo.78@gmail.com

‡ Current address: Unit of Statistics, Bioinformatics and Registry, Danish Cancer Society Research Center, Strandboulevarden 49, 2100, Copenhagen, Denmark

**Table S1. Information on the E2 sequences used for the multiple sequence alignment in Figure S1 and the phylogenetic analysis reported in Fig1.**

| Label         | Family | Organism                  | Protein Names     | Uniprot ID |
|---------------|--------|---------------------------|-------------------|------------|
| Sc_Ubc1_1     | 1      | S.cerevisiae              | Ubc1              | P21734     |
| Sp_Ubc1_1     | 1      | S.pombe                   | Ubc1              | O74810     |
| Hs_UBE2K_1    | 1      | H.sapiens                 | UBE2K/E2_25k/HIP2 | P61086     |
| Os_Ubc1_1     | 1      | O.sativa                  | Ubc1              | Q8S1Y5     |
| Ce_Ubc20_1    | 1      | C.elegans                 | Ubc20             | Q9TZ69     |
|               |        |                           |                   |            |
| Ce_Ubc1_2     | 2      | C.elegans                 | Ubc1              | P52478     |
| Hs_UBE2A_2    | 2      | H.sapiens                 | UBE2A/hHR6A       | P49459     |
| Dm_UbcD6_2    | 2      | D.melanogaster            | UbcD6             | P25153     |
| At_Ubc1_2     | 2      | A.tahaliana               | Ubc1              | P25865     |
| At_Ubc3_2     | 2      | A.tahaliana               | Ubc3              | P42746     |
| Sc_Ubc2_2     | 2      | S.cerevisiae              | Ubc2/Rad6         | P06104     |
| Nh_Rad6_2     | 2      | N.haematococca            | Rad6              | P78717     |
| Sp_Ubc2       | 2      | S.pombe                   | Ubc2              | P23566     |
|               |        |                           |                   |            |
| Sc_Ubc3_3     | 3      | S.cerevisiae              | Ubc3/Cdc34        | P14582     |
| Hs_Ube2R1_3   | 3      | H.sapiens                 | Ube2R1/Cdc34      | P49427     |
| Ce_Ubc3_3     | 3      | C.elegans                 | Ubc3              | Q95XN7     |
| Sc_Ubc7_3     | 3      | S.cerevisiae              | Ubc7              | Q02159     |
| Mm_Ube2G2_3   | 3      | M.musculus                | Ube2G2            | P60605     |
| Ce_Ubc7_3     | 3      | C.elegans                 | Ubc7              | P34477     |
| Hs_Ube2G1_3   | 3      | H.sapiens                 | Ube2G1            | P62253     |
| Ta_Ubc7_3     | 3      | T.aestivum                | Ubc7              | P25868     |
| Sp_Ubc15_3    | 3      | S.pombe                   | Ubc15             | Q9Y818     |
| Asfv_ubcB_3   | 3      | African swine fever virus | ubcB              | P25869     |
| Ec_Ubc3_3     | 3      | E.cuniculi                | Ubc3              | Q8SS54     |
|               |        |                           |                   |            |
| Hs_UBE2E1_4   | 4      | H.sapiens                 | UBE2E1/UbcH6      | P51965     |
| Sc_Ubc4_4     | 4      | S.cerevisiae              | Ubc4              | P15731     |
| Ce_Ubc2_4     | 4      | C.elegans                 | Ubc2/Let70        | P35129     |
| Xl_Ubc4_4     | 4      | X.leavis                  | Ubc4              | P62840     |
| Hs_Ubc2D2_4   | 4      | H.sapieins                | Ubc2D2/UbcH5B     | P62837     |
| Mm_MGC58426_4 | 4      | M.musculus                | MGC58426          | A2AFH2     |
| Dm_CG5440_4   | 4      | D.melanogaster            | CG5440            | Q9VQ00     |
| Dm_CG10862_4  | 4      | D.melanogaster            | CG10862           | Q9I7T6     |
| Dm_CG2574_4   | 4      | D.melanogaster            | CG2574            | Q9VYN3     |
|               |        |                           |                   |            |
| Hs_UBE2J2_5   | 5      | H.sapiens                 | NCUBE2            | Q8N2K1     |
| Sc_Ubc6_5     | 5      | S.cerevisiae              | Ubc6              | P33296     |
| Ce_Ubc15_5    | 5      | C.elegans                 | Ubc15/ISO A       | Q18931     |
| Pm_Sb55_5     | 5      | P.mariana                 | Sb55              | Q65079     |

|              |    |                     |            |        |
|--------------|----|---------------------|------------|--------|
| At Ubc32_5   | 5  | A.tahaliana         | Ubc32      | Q9LSP7 |
| Hs_UBE2J1_5  | 5  | H.sapiens           | NCUBE1     | Q9Y385 |
|              |    |                     |            |        |
| Hs_UBE2H_6   | 6  | H.sapiens           | UBE2H      | P62256 |
| Ce_Ubc8_6    | 6  | C.elegans           | Ubc8       | Q9N2W9 |
| At_Ubc6_6    | 6  | A.tahaliana         | Ubc6       | P42750 |
| Sc_Ubc8_6    | 6  | S.cerevisiae        | Ubc8/UbcH2 | P28263 |
| Sp_Ubc8_6    | 6  | S.pombe             | Ubc8       | O74810 |
| Dm_CG14739_6 | 6  | D.melanogaster      | CG14739    | Q9VGD6 |
|              |    |                     |            |        |
| Sc_Ubc9_7    | 7  | S.cerevisiae        | Ubc8       | P50623 |
| Mm_Ube2I     | 7  | M.musculus          | Ube2I      | P63280 |
| Hs_Ube2I     | 7  | H.sapiens           | Ube2I      | P63279 |
| Sp_Ubc9_7    | 7  | S.pombe             | Ubc9       | P40984 |
| At_AHUS5_7   | 7  | A.tahaliana         | AHUS5      | Q42551 |
|              |    |                     |            |        |
| Hs_Ube2F_8   | 8  | H.sapiens           | Ube2F      | Q969M7 |
| Ce_Ubc12_8   | 8  | C.elegans           | Ubc12      | Q9XVK5 |
| Hs_Ube2M_8   | 8  | H.sapiens           | Ube2M      | P61081 |
| Sp_Ubc12_8   | 8  | S.pombe             | Ubc12      | O74549 |
| At_RCE2_8    | 8  | A.tahaliana         | RCE2       | Q9ZU75 |
| Nc_Ubc_8     | 8  | N.crassa            | Ubc-like   | Q8X018 |
| Sc_Ubc12_8   | 8  | S.cerevisiae        | Ubc12      | P52491 |
|              |    |                     |            |        |
| Hs_UBE2T_9   | 9  | H.sapiens           | UBE2T      | Q9NPD8 |
| Sc_Ubc13_9   | 9  | S.cerevisiae        | Ubc13      | P52490 |
| Hs_UBE2N_9   | 9  | H.sapiens           | UBE2N      | P61088 |
| Lm_Ubc_9     | 9  | L.major             | Ubc9       | Q9NED4 |
|              |    |                     |            |        |
| Hs_UBE2S_11  | 11 | H.sapiens           | UBE2S      | Q6NXQ4 |
| At_UBC22_11  | 11 | A.tahaliana         | UBC22      | Q9FF66 |
| Sc_Ubc10_11  | 11 | S.cerevisiae        | Ubc10      | P29340 |
| Sp_UBC16_11  | 11 | S.pombe             | UBC16      | Q9P6I1 |
|              |    |                     |            |        |
| Sc_Ubc11_12  | 12 | S.cerevisiae        | Ubc11      | P52492 |
| Ss_E2C_12    | 12 | S.solidissima(clam) | E2C        | Q95044 |
| Hs_UBE2C_12  | 12 | H.sapiens           | UBE2C      | O00762 |
| Dm_VIHAR_12  | 12 | D.melanogaster      | VIHAR      | Q9VTY6 |
| At_Ubc19_12  | 12 | A.tahaliana         | Ubc19      | Q9LJZ5 |
|              |    |                     |            |        |
| Hs_UBE2W_13  | 13 | H.sapiens           | UBE2W      | Q96BO2 |
| Ce_Ubc16_13  | 13 | C.elegans           | Ubc16      | Q9XWF6 |
| At_UBC15_13  | 13 | A.tahaliana         | UBC15      | P42743 |
|              |    |                     |            |        |
| Hs_BIRC6_14  | 14 | H.sapiens           | BIRC6      | Q9NR09 |
| Ce_Ubc17_14  | 14 | C.elegans           | Ubc17      | Q11079 |
| At_Ubc23_14  | 14 | A.tahaliana         | Ubc23      | Q9ZVX1 |
| Hs_UBE2O_14  | 14 | H.sapiens           | UBE2O      | Q9C0C9 |

|               |    |                |              |        |
|---------------|----|----------------|--------------|--------|
| Dm_CG10254_14 | 14 | D.melanogaster | CG10254      | Q9XZ32 |
| Hs_UBE2Z_14   | 14 | H.sapiens      | UBE2Z        | A6NC60 |
|               |    |                |              |        |
| Hs_UBE2L6_15  | 15 | H.sapiens      | UBE2L6       | O14933 |
| Hs_UBE2L3_15  | 15 | H.sapiens      | UBE2L3/UbcH7 | P68036 |
| Ce_Ubc18_15   | 15 | C.elegans      | Ubc18        | Q21633 |
| Dm_CG17030_15 | 15 | D.melanogaster | CG17030      | Q9VZ73 |
| Ce_Ubc24_15   | 15 | C.elegans      | Ubc24        | Q20617 |
| Dm_UbcD84_15  | 15 | D.melanogaster | UbcD84       | P52486 |

**Table S2. Summary of our MD simulations of E2 variant and their complexes.**

| <b>E2 variant</b> | <b>Organism/Source</b> | <b>Catalytic site residues</b>  | <b>Number and duration of replicas</b>                            | <b>Starting structure</b>                                                                                                   |
|-------------------|------------------------|---------------------------------|-------------------------------------------------------------------|-----------------------------------------------------------------------------------------------------------------------------|
| hHR6A             | Human                  | Cys88<br>CES/D site:<br>Ser120  | 4 replicates x<br>160 ns each<br>(total duration<br>0.64 $\mu$ s) | wild type hHR6A homology model using hHR6B NMR structure (pdb entry 1JAS <sup>1</sup> ) as template (sequence identity 96%) |
| hHR6A-pS120       | Human                  | Cys88<br>CES/D site:<br>pSer120 | 4 replicates x<br>160 ns each<br>(total duration<br>0.64 $\mu$ s) | phospho-Ser120 hHR6A homology model using hHR6B NMR structure (pdb entry 1JAS <sup>1</sup> ) as template                    |
| hHR6A-S120D       | Human                  | Cys88<br>CES/D site:<br>Asp120  | 4 replicates x<br>160 ns each<br>(total duration<br>0.64 $\mu$ s) | S120D hHR6A homology model using hHR6B NMR structure (pdb entry 1JAS <sup>1</sup> ) as template                             |
| hHR6A-S120A       | Human                  | Cys88<br>CES/D site:<br>Ala120  | 4 replicates x<br>160 ns each<br>(total duration<br>0.64 $\mu$ s) | S120A hHR6A homology model using hHR6B NMR structure (pdb entry 1JAS <sup>1</sup> ) as template                             |
| hHR6A-S120T       | Human                  | Cys88<br>CES/D site:<br>Thr120  | 4 replicates x<br>160 ns each<br>(total duration<br>0.64 $\mu$ s) | S120T hHR6A homology model using hHR6B NMR structure (pdb entry 1JAS <sup>1</sup> ) as template                             |
| hHR6A-S120E       | Human                  | Cys88<br>CES/D site:<br>Glu120  | 4 replicates x<br>160 ns each<br>(total duration<br>0.64 $\mu$ s) | S120E hHR6A homology model using hHR6B NMR structure (pdb entry 1JAS <sup>1</sup> ) as template                             |
| Rad6              | <i>S.cerevisiae</i>    | Cys87<br>CES/D site:<br>Ser119  | 4 replicates x<br>160 ns each<br>(total duration<br>0.64 $\mu$ s) | X-ray structure of wild-type Rad6 (pdb entry 1AYZ <sup>2</sup> )                                                            |
| Rad6-pS120        | <i>S.cerevisiae</i>    | Cys87<br>CES/D site:<br>pSer119 | 4 replicates x<br>160 ns each<br>(total duration<br>0.64 $\mu$ s) | <i>In-silico</i> mutation starting from the X-ray structure of wild-type Rad6 (pdb entry 1AYZ <sup>2</sup> )                |
| Rad6-S120D        | <i>S.cerevisiae</i>    | Cys87<br>CES/D site:<br>Asp119  | 4 replicates x<br>160 ns each<br>(total duration<br>0.64 $\mu$ s) | <i>In-silico</i> mutation starting from the X-ray structure of wild-type Rad6 (pdb entry 1AYZ <sup>2</sup> )                |
| Rad6-S120A        | <i>S.cerevisiae</i>    | Cys87<br>CES/D site:<br>Ala119  | 4 replicates x<br>160 ns each<br>(total duration<br>0.64 $\mu$ s) | <i>In-silico</i> mutation starting from the X-ray structure of wild-type Rad6 (pdb entry 1AYZ <sup>2</sup> )                |
| hHR6B             | Human                  | Cys87<br>CES/D site:<br>Ser119  | 4 replicates x<br>160 ns each<br>(total duration<br>0.64 $\mu$ s) | NMR structure of wild-type hHR6B (pdb entry 1JAS <sup>1</sup> )                                                             |
| Ubc1              | <i>S.cerevisiae</i>    | Cys88<br>CES/D site:            | 4 replicates x<br>160 ns each<br>(total duration                  | X-ray structure of wild-type Ubc1 (pdb entry 1FZY <sup>3</sup> )                                                            |

|                             |       |                                 |                                                                   |                                                                                                                                                          |
|-----------------------------|-------|---------------------------------|-------------------------------------------------------------------|----------------------------------------------------------------------------------------------------------------------------------------------------------|
|                             |       | Ser120                          | 0.64 $\mu$ s)                                                     |                                                                                                                                                          |
| Ube2I                       | Human | Cys93<br>CES/D site:<br>Asp127  | 4 replicates x<br>160 ns each<br>(total duration<br>0.64 $\mu$ s) | X-ray structure of wild-type<br>Ube2I (pdb entry 1A3S <sup>4</sup> )                                                                                     |
| Ube2I-SUB                   | Human | Cys93<br>CES/D site:<br>Asp127  | 2 replicates x<br>80 ns each<br>(total duration<br>0.16 $\mu$ s)  | X-ray structure of wild-type<br>Ube2I in complex with<br>RanGAP (PDB entry<br>2GRN <sup>5</sup> )                                                        |
| Ube2I <sub>D127S</sub> -SUB | Human | Cys93<br>CES/D site:<br>Ser127  | 2 replicates x<br>80 ns each<br>(total duration<br>0.16 $\mu$ s)  | X-ray structure of D127S<br>Ube2I variant in complex<br>with RanGAP (PDB entry<br>2GRR <sup>5</sup> )                                                    |
| Ube2I <sub>pS127</sub> -SUB | Human | Cys93<br>CES/D site:<br>pSer127 | 2 replicates x<br>80 ns each<br>(total duration<br>0.16 $\mu$ s)  | <i>In-silico</i> mutation starting<br>from the X-ray structure of<br>D127S Ube2I variant in<br>complex with RanGAP (PDB<br>entry 2GRR <sup>5</sup> )     |
| Ube2I <sub>D127A</sub> -SUB | Human | Cys93<br>CES/D site:<br>Ala127  | 2 replicates x<br>80 ns each<br>(total duration<br>0.16 $\mu$ s)  | X-ray structure of D127A<br>Ube2I variant in complex<br>with RanGAP (PDB entry<br>2GRQ <sup>5</sup> )                                                    |
| Ube2I <sub>D127T</sub> -SUB | Human | Cys93<br>CES/D site:<br>Thr127  | 2 replicates x<br>80 ns each<br>(total duration<br>0.16 $\mu$ s)  | <i>In-silico</i> mutation starting<br>from the X-ray structure of<br>wild-type Ube2I variant in<br>complex with RanGAP (PDB<br>entry 2GRN <sup>5</sup> ) |
| Ube2I <sub>D127E</sub> -SUB | Human | Cys93<br>CES/D site:<br>Glu127  | 2 replicates x<br>80 ns each<br>(total duration<br>0.16 $\mu$ s)  | <i>In-silico</i> mutation starting<br>from the X-ray structure of<br>wild-type Ube2I variant in<br>complex with RanGAP (PDB<br>entry 2GRN <sup>5</sup> ) |

## References

1. Miura, T., Klaus, W., Ross, A., Guentert, P. & Senn, H. The NMR structure of the class I human ubiquitin-conjugating enzyme 2b. *J. Biomol. NMR.* **22**, 89-92 (2002).
2. Worthylake, D.K., Prakash, S., Prakash, L. & Hill, C.P. Crystal structure of the *Saccharomyces cerevisiae* ubiquitin-conjugating enzyme Rad6 at 2.6 Å resolution. *J. Biol. Chem.* **273**: 6271-6276 (1998).
3. Hamilton, K.S. et al. Crystal structure of *Saccharomyces cerevisiae* ubiquitin conjugating enzyme 1. **9**: 897-904 (2001).
4. Giraud, M.F., Desterro, J.M. & Naismith, J.H. Structure of ubiquitin-conjugating enzyme 9 displays significant differences with other ubiquitin-conjugating enzymes, which may reflect its specificity for Sumo rather than ubiquitin. *Acta Crystallogr. Sect D.* **54**: 891-898 (1998).
5. Yunus, A.A. & Lima, C. D. Lysine activation and functional analysis of E2-mediated conjugation in the SUMO pathway. *Nat. Struct. Mol. Biol.* **13**, 491–9 (2006).

**Table S3. Hydrogen bond and salt bridges observed in the Ube2I-RanGAP1 simulations between the residue at position 127 (CES/D site) and the substrate acceptor lysine (Lys524).**

The Ube2I<sub>D127A</sub>-RanGAP1 is not reported in this table since due to the hydrophobic nature of its side chain, an alanine residue at the CES/D site cannot be involved in electrostatic or hydrogen-bond interactions. Hydrogen bonds have been calculated using g\_hbond tool of Gromacs, whereas salt bridges have been calculated using PyInteraph (<http://linux.btbs.unimib.it/pyinteraph/>). Hydrogen bonds are thus defined using a angle cutoff between donor-hydrogen-acceptor atoms of 30° and a distance cutoff of 0.35 nm between donor-acceptor atoms. Salt bridges have been defined with a distance cutoff of 0.45 nm between the charged groups of the two residues forming the salt bridge, using PyInteraph default definition.

| <b>E2 variant</b>               | <b><i>Pair of interacting residues</i></b> | <b>Salt-bridge population</b> | <b>Hydrogen Bond population</b> |
|---------------------------------|--------------------------------------------|-------------------------------|---------------------------------|
| Ube2I <sub>pS127</sub> -RanGAP1 | pS127-K524                                 | 100%                          | 100%                            |
| Ube2I-RanGAP1                   | D127-K524                                  | 45%                           | 23%                             |
| Ube2I <sub>D127E</sub> -RanGAP1 | E127-K524                                  | 74%                           | 30%                             |
| Ube2I <sub>D127S</sub> -RanGAP1 | S127-K524                                  | /                             | 7%                              |
| Ube2I <sub>D127T</sub> -RanGAP1 | T127-K524                                  | /                             | 0.4 %                           |

**Figure S1. Multiple sequence alignment of E2 superfamily members used for the phylogenetic analysis.** Identical residues (red-filled-boxes) and similar residues (red boxes) are indicated.



|               |   |              | $\alpha 1$                                                     | $\eta 1$ | $\beta 1$ | $\beta 2$ | TT |
|---------------|---|--------------|----------------------------------------------------------------|----------|-----------|-----------|----|
| Sc Ubc1_1     |   |              | 0000.000000000                                                 | 00.....0 | →         | →         |    |
| Sc Ubc1_1     | 1 | MS...RA      | KRIMKEIQAVK...DDPA...AHITLEFV.SES...DTHHLKGTFLGP.PGT           |          |           |           |    |
| Sp Ubc1_1     | 1 | MSD...NRS    | RRIAKELADVQ...QDKQ...AGIQVWTI.ND...DTHSLKGMFRGP.EGT            |          |           |           |    |
| Hs UBE2K_1    | 1 | MAN...IAV    | RRIKREFKEVLKS...EETSK...NQIKVDLV.DE...NTHLRTGTLAGP.PDT         |          |           |           |    |
| Os Ubc_1      | 1 | MVD...VS...R | RVQKELTECNR...DREVS...GVSIALH.DGS...TTHSLTGTLAGP.QGT           |          |           |           |    |
| Ce Ubc20_1    | 1 | MSN...IAF    | NRLLQRECKEVVT...NSEISE...TGMIEIL.NE...NTHPEIKGHIRGP.PDT        |          |           |           |    |
| Ce Ubc1_2     | 1 | MTT...PSR    | RRRLMRDFPKLQE...DPP...AGVSGAPT.ED...NTHLWEAIVFGP.EGT           |          |           |           |    |
| Hs UBE2A_2    | 1 | MST...PAR    | RRRLMRDFPKRLQE...DPP...AGVSGAPS.EN...NTHMVWNAVIFGP.EGT         |          |           |           |    |
| Dm UbcD6_2    | 1 | MST...PAR    | RRRLMRDFPKRLQE...DPP...TGVSGAPT.DN...NTHMIWNAVIFGP.HDT         |          |           |           |    |
| At Ubc1_2     | 1 | MST...PAR    | RRRLMRDFPKRLQ...DPP...AGISGAPQ.DN...NTHMLWNAVIFGP.DDT          |          |           |           |    |
| At Ubc3_2     | 1 | MTT...PAK    | RRRLMRWDFKRLQ...DPP...VGISGAPQ.DN...NTHMHNVALIFGP.EDT          |          |           |           |    |
| Sc Ubc2_2     | 1 | MST...PAR    | RRRLMRDFPKRMQE...DAP...PGVSASPL.PD...NTHMVWNAVIFGP.ADT         |          |           |           |    |
| Nh Rad6_2     | 1 | MST...AAR    | RRRLMRDFPKRMQT...DPP...AGVSASPV.PD...NTHMVWNAVIFGP.ADT         |          |           |           |    |
| Sp Ubc2_2     | 1 | MST...TAR    | RRRLMRDFPKRMQ...DPP...AGVSASPV.SD...NTHVMLWNAVIFGP.ADT         |          |           |           |    |
| Sc Ubc3_3     | 1 | MSSRKSTAS    | SLLLRQY.RELT...DPKKA...PSFHIELE.DDS...NTHFTWNIGVMVLNEDS        |          |           |           |    |
| Hs Ube2R1_3   | 1 | MARPLVPSS    | QKALLLELKLKGLQE...EPV...EGFRVTLV.DEG...NTHYNWEVAIFGP.PNT       |          |           |           |    |
| Ce Ubc3_3     | 1 | MDSKASTSSGAL | RLRAMELKNLQS...QPV...EGFTID.VNED...NTHFVWTVGYGP.PKT            |          |           |           |    |
| Sc Ubc7_3     | 1 | MSKTA...Q    | KRLLKLELQDLIK...DSP...PGIVAGPKSEN...NTHLFWDCIQQGP.PDT          |          |           |           |    |
| Mm Ube2G2_3   | 1 | MAGT...A     | KRLMABEYKQLTL...NPP...EGIVAGPMNEE...NTHFEWEALIMGP.EDT          |          |           |           |    |
| Ce Ubc7_3     | 1 | ME...QSS     | LLKQLADMTLR...VPV...DGFSAGLV.DD...NTHLYKWEVLIIFGP.PDT          |          |           |           |    |
| Hs Ube2G1_3   | 1 | MTEL.QSA     | LLLRQQLAELNK...NPV...EGFSAGLI.DD...NTHLYRWEVLIIFGP.PDT         |          |           |           |    |
| Ta Ubc7_3     | 1 | MATAPARRAS   | SSSRSSSEISRT...TPS...MGFQLGFV.DDS...NTHFEWQVITIFGP.PET         |          |           |           |    |
| Sp Ubc15_3    | 1 | MSS.ASE      | QLLRKLELQDLIK...NPP...QGFSVGLV.DDK...SITHFEWQVITIFGP.EDT       |          |           |           |    |
| AsFv ubcB_3   | 1 | MVSSF        | LLABEYKNLIV...NPS...EHFKIS.VNED...NTHLEWDEVILKGP.PDT           |          |           |           |    |
| Ec Ubc_3      | 1 | MANKGGFS     | KGLLLKLDYKRMQE...NPN...EYYSVGLV.DG...DITHYTWEVMIIFGP.RKT       |          |           |           |    |
| Hs UBE2E1_4   | 1 | STSA         | KRIQKELADITL...DPPPN...CSAGPKGDN...DTHYEWIRSTILGP.PGS          |          |           |           |    |
| Sc Ubc4_4     | 1 | MSSS         | KRIAKELSDLER...DPPTS...CSAGPVGDD...DTHYHWQASIMGP.ADS           |          |           |           |    |
| Ce Ubc2_4     | 1 | MA.L         | KRIQKELQDLGR...DPPAQ...CSAGPVGDD...DTHPHWQATIMGP.PES           |          |           |           |    |
| Xl Ubc4_4     | 1 | MA.L         | KRIHKELNDLAR...DPPAQ...CSAGPVGDD...DTHPHWQATIMGP.NDS           |          |           |           |    |
| Hs Ubc2D2_4   | 1 | MA.L         | KRIHKELNDLAR...DPPAQ...CSAGPVGDD...DTHPHWQATIMGP.NDS           |          |           |           |    |
| Mm MGC58426_4 | 1 | MA.L         | KRIQKELVAISQ...DPPAH...CSAGPVAEN...DTHPHWQATIMGP.EDS           |          |           |           |    |
| Dm CG5440_4   | 1 | TCSNSAVK     | KRIQKELDEITR...DPPQY...CSAGPKEDN...DTHYEWTSTIFGP.ADS           |          |           |           |    |
| Dm CG10862_4  | 1 | PLT.I        | TRLRREISEFST...DQTEG...CKAEMVGDN...DTHPHWVATIFGP.SET           |          |           |           |    |
| Dm CG2574_4   | 1 | TGCV         | VRIKSELQDIRK...NPPPN...CTADLHHGD...DTHLHWTAGVNGP.VGS           |          |           |           |    |
| Hs UBE2J2_5   | 1 | TAT          | QRLLKQDYLRIRIK...DPVPY...ICAEP.L...NTHLEWHYVVRGP.EMT           |          |           |           |    |
| Sc Ubc6_5     | 1 | AH           | KRLTKBYKLMVE...NPPPY...ILARP.N.ED...NTHLEWHYIITGP.ADT          |          |           |           |    |
| Ce Ubc15_5    | 1 | SAV          | RRLLQKDYAKLMQ...DPVDG...IKALPN.ED...NTHLEWHYICLRS.PDT          |          |           |           |    |
| Pm Sb55_5     | 1 | ACV          | KRLQKEFRALCK...EPVFN...VVARPS.PS...DTHLEWHYVLEGS.EGT           |          |           |           |    |
| At Ubc32_5    | 1 | KNP          | AVKRIQLQEVKEMQA...NPSDD...FMSLPL.EE...NTHFEWQFAIFGP.GDT        |          |           |           |    |
| Hs UBE2J1_5   | 1 | PAV          | KRLMKEBAELK...DPTDH...YHAQPL.ED...NTHLEWHYVVRGP.PDS            |          |           |           |    |
| Hs UBE2H_6    | 1 | MSSPS        | PKRRMDTDVVKLIE...SKHEV...TILG...NTHLEFVVKFYGP.QGT              |          |           |           |    |
| Ce Ubc8_6     | 1 | MTSATAIG     | KRRIDCDVVKLIS...HNHEV...QIVNG...NTHSEFIVRFHGP.KDT              |          |           |           |    |
| At Ubc6_6     | 1 | MASP...S     | KRRRMDMMLKMM...SDYKV...DTVN.DD...DTHLQMFYVTFHGP.TDS            |          |           |           |    |
| Sc Ubc8_6     | 1 | MSS...S      | KRRRIETDVMKLLM...SDHQV...DLIN.DS...DTHMQEFHVKIFLGP.KDT         |          |           |           |    |
| Sp Ubc8_6     | 1 | MSSP...R     | RRRIETDVMKLLM...SDYEV...TLVN.DN...DTHMQEFYVRFHGP.SET           |          |           |           |    |
| Dm CG14739_6  | 1 | LVNTTLP      | MAGRLLDRDVRNRLA...SGYR...TTVD.DD...DTHMNLNVCLLEGP.LGS          |          |           |           |    |
| Sc Ubc9_7     | 1 | MSS.LC       | LQRLOEERKKWRK...DHP...FGFYAKPV.KKADGSMDLQKWEAGIPGK.EGT         |          |           |           |    |
| Mm Ube2I_7    | 1 | MSG.IA       | LSRLAQERKAWRK...DHP...FGFVAVPT.KNPDGTMNLMNWECAIPGK.KGT         |          |           |           |    |
| Hs Ube2I_7    | 1 | MSG.IA       | LSRLAQERKAWRK...DHP...FGFVAVPT.KNPDGTMNLMNWECAIPGK.KGT         |          |           |           |    |
| Sp Ubc9_7     | 1 | MSS.LC       | KTRLOEERKQWRR...DHP...FGFYAKPC.KSSDGGLDLMNWKVGPgk.PKT          |          |           |           |    |
| At AHU5_7     | 1 | MASGIAR      | GRLAERKSWRK...NHP...HGFVAKPE.TGQDGTVMNLMWHCTIPGK.AGT           |          |           |           |    |
| Hs Ube2F_8    | 1 | RVS          | VRDKLVKEVABLEA...NLPCT...CKVHF.PDP...DTHLWHCFQLVTP.DEG         |          |           |           |    |
| Ce Ubc12_8    | 1 | RIAVR        | DKLQAQELQLELT...ALRDQK...QKLWHLEVPST...DTHLHELELVTP.QEG        |          |           |           |    |
| Hs Ube2M_8    | 1 | KASAA        | QLRIQKDLINLNL...PKTCD...ISFSD.PD...DTHLNLFKLVICP.DEG           |          |           |           |    |
| Sp Ubc12_8    | 1 | ISPA         | QIRIQKDVTDLEI...PSTMS...TSWPD.PI...DTHLNLV.LHLEIRP.DEG         |          |           |           |    |
| At RCE2_8     | 1 | KQSAGE       | LRLHKDISELNL...PKSCK...ISFPNG.KN...DTHLNLN.FEVTIKP.DEG         |          |           |           |    |
| Nc Ubc_8      | 1 | KVTAA        | QLRVQKDLSELSL...GSTMK...TEFPD.PD...DTHLNLN.FILYIP.DEG          |          |           |           |    |
| Sc Ubc12_8    | 1 | NLSAAR       | IRLKRDLDSLDTL...PPTVTL...NVIT...SPDSADRSQPK.LEVVRP.DEG         |          |           |           |    |
| Hs UBE2T_9    | 1 | MQ.RAS       | RLKRRLHMLAT...EPPP...GITCQW.DKD...DTHMQDDLRAQLGG.ANT           |          |           |           |    |
| Sc Ubc13_9    | 1 | MASL         | PKRIIKEKTEKLVS...DPVP...GITAEPH.DD...NTHLYRFQVTEGP.EQS         |          |           |           |    |
| Hs UBE2N_9    | 1 | MAGL         | PRRIIKETQRLLA...EPVP...GIKAEPD.ES...NTHLYRFHVVIAGP.QDS         |          |           |           |    |
| Lm Ubc_9      | 1 | M.LT         | TTRRIIKEKTEKLQ...ECPP...GITATPT.KE...NTHLYRFYMVTIQGP.PQS       |          |           |           |    |
| Hs UBE2S_11   | 1 | ENL          | PHIIRLVYKEVTTTLA...DPP...DGIKVFPN.EE...DTHLTDLQVTEGP.EGT       |          |           |           |    |
| At UBC22_11   | 1 | ENL          | PPNVIKQLAKEK.L.SLD...ESPP...DGIKVVVN.DE...DTHLHQICADIFGP.VGT   |          |           |           |    |
| Sc Ubc10_11   | 1 | TSDT         | CMSTRIVKEYVKILKTLASDDPIANPYRGIIESLNPIDET...DTHLQSKWEAIVSGP.SDT |          |           |           |    |
| Sp Ubc16_11   | 1 | MNSS         | IKRLHKEYASFQA...GDI...SGLLLLKPVTDV...DTHLPHWKAVIFGP.TET        |          |           |           |    |
| Sc Ubc11_12   | 1 | CVT          | KRLQNELQLLS...STT...ESISAFP.VDD...NTHLYTWVGYITGP.KDT           |          |           |           |    |
| Ss E2C_12     | 1 | SVS          | KRLQBELRITLLM...SGD...PGITAFP.DGD...NTHLQFKWVATIDGP.KDT        |          |           |           |    |
| Hs UBE2C_12   | 1 | PVG          | KRLQBELMTLMM...SGD...KGISAFP.ESD...NTHLQFKWGTIHGA.AGT          |          |           |           |    |
| Dm VIHAR_12   | 1 | AVS          | KRLHKELMNLM...ANE...RGISAFP.DGE...NTHLQFKWGTIAGP.RNT           |          |           |           |    |
| At Ubc19_12   | 1 | SVL          | KRLQSELMNLM...GAD...PGISAFP.EED...NTHLQFKWGTITGS.KDT           |          |           |           |    |
| Hs UBE2W_13   | 1 | MA.SM        | KRLQKELLALQN...DPPP...GMTLNEKSVQN...DTHLQWQIVMEGA.PGT          |          |           |           |    |
| Ce Ubc16_13   | 1 | MSDAAT       | RRLMKELAQLKS...EAPE...GLLVNNTSTSN...DTHLQKQKIGVMEGA.EGT        |          |           |           |    |
| At UBC15_13   | 1 | RKALS        | KIACNRLQKELSEWQL...NPPT...GFRHKVTD...NTHLQKWTIDVTGA.PGT        |          |           |           |    |
| Hs BIRC6_14   | 1 | SAARA        | RRRLAQEAVTLST...SLP...LSSSSSVFVRC.DEE...RDLHDMKVLITGP.ADT      |          |           |           |    |
| Ce Ubc17_14   | 1 | HLRDR        | TKRIAKELASIAN...ALP...LNASNSIYVCY.DEG...RVDIHKVLIISGP.DDT      |          |           |           |    |
| At Ubc23_14   | 1 | KERQW        | FKKVDQDWKILQN...NLP...DGIFVRA.YED...RMDLLRALIVGA.FGT           |          |           |           |    |
| Hs UBE2O_14   | 1 | EAKK         | FSTVRKHEMALLAT...SLP...EGIMVKT.FED...RMDPLFSALIKGP.TRT         |          |           |           |    |
| Dm CG10254_14 | 1 | ANKAQY       | QRLAVREYLMKLS...SLP...NGVVRA.YED...RMDLMSVMVGP.KRT             |          |           |           |    |
| Hs UBE2Z_14   | 1 | RTAPQ        | CLRIRKRDIMSIYK...EPP...PGMFVVP.DTV...DMDTKIHVALITGP.FDT        |          |           |           |    |
| Hs UBE2L6_15  | 1 | MMA          | SMRVVKELEDLQK...PPPY.L...RNLSSDDA...NTHLVWHALLL.P.DQP          |          |           |           |    |
| Hs UBE2L3_15  | 1 | MAAS         | RRLMKELLEEIRK...CGMKNF...RNIQVDEA...NTHLQWQGLIV.P.DNP          |          |           |           |    |
| Ce Ubc18_15   | 1 | MSA          | TRRLQKELGLDLKN...CGVKAY...ENVECEET...NTHLQKWTVLII.P.DKE        |          |           |           |    |
| Dm CG17030_15 | 1 | EEPLMD       | GPKRRMNRRELADMLE...DKQNLQF...RNLLEVPN...NTHLYKQFKLMP.P.VAQ     |          |           |           |    |
| Ce Ubc24_15   | 1 | AAHGRIV      | QLSRRIRKELADLAK...NKRR...FIKDFRKIEK...DTHCKDIFQFKIIGD.GV       |          |           |           |    |
| Dm UbcD84_15  | 1 | MAAT         | RRRLTRELSDLVE...AKMSTL...RNISSDE...DTHLQWWTGLIV.P.EKA          |          |           |           |    |

| <i>Sc Ubc1_1</i>     |    | $\beta 3$ | $\beta 4$ | TT     | TTT | $\eta 2$ |                               |    |      |      |                           |                         |                   |
|----------------------|----|-----------|-----------|--------|-----|----------|-------------------------------|----|------|------|---------------------------|-------------------------|-------------------|
| <i>Sc Ubc1_1</i>     | 46 | PYEGGK    | FVVD      | TEVPM  | YF  | FKFP     | KMQFDT. . . . . KVVHP         | NI | SSVT | GAI  | ICLD                      | ILKN. . . . . AWS       |                   |
| <i>Sp Ubc1_1</i>     | 47 | PYEGGY    | FVVD      | IEPID  | YF  | FRFP     | KMNFDT. . . . . KIYHP         | NV | SSQT | GAI  | ICLD                      | ILKD. . . . . QWS       |                   |
| <i>Hs UBE2K_1</i>    | 50 | PYEGGR    | YQLE      | IKIPET | YF  | PNFP     | PKVRFT. . . . . KIWHHP        | NI | SSVT | GAI  | ICLD                      | ILKD. . . . . QWA       |                   |
| <i>Os Ubc_1</i>      | 47 | PYEGGT    | FVID      | IRLPG  | YF  | PEFP     | KMQFDT. . . . . KVVHP         | NI | SSQN | GAI  | ICLD                      | ILKN. . . . . QWS       |                   |
| <i>Ce Ubc20_1</i>    | 50 | PYAGGM    | FDDL      | IKIPDQ | YF  | PSFP     | PNVKFT. . . . . KIWHHP        | NV | SSQT | GVI  | ICLD                      | ILKD. . . . . QWA       |                   |
| <i>Ce Ubc1_2</i>     | 47 | PFEDEG    | FKLS      | LEFTEE | YF  | PNKP     | PTVKFIS. . . . . KMFFHP       | NV | YAD  | GS   | ICLD                      | ILQN. . . . . RWS       |                   |
| <i>Hs UBE2A_2</i>    | 47 | PFEDEG    | FKLT      | IEFTEE | YF  | PNKP     | PTVRFVS. . . . . KMFFHP       | NV | YAD  | GS   | ICLD                      | ILQN. . . . . RWS       |                   |
| <i>Dm UbcD6_2</i>    | 47 | PFEDEG    | FKLT      | IEFTEE | YF  | PNKP     | PTVRFVS. . . . . KVFHHP       | NV | YAD  | GS   | ICLD                      | ILQN. . . . . RWS       |                   |
| <i>At Ubc1_2</i>     | 47 | PWDGGT    | FKLS      | LQFSED | YF  | PNKP     | PTVRFVS. . . . . RMFFHP       | NI | YAD  | GS   | ICLD                      | ILQN. . . . . QWS       |                   |
| <i>At Ubc3_2</i>     | 47 | PWDGGT    | FKLT      | LHFTED | YF  | PNKP     | PIVRFVS. . . . . RMFFHP       | NI | YAD  | GS   | ICLD                      | ILQN. . . . . QWS       |                   |
| <i>Sc Ubc2_2</i>     | 47 | PYEDGT    | FRLV      | LEFDEE | YF  | PNKP     | PHVKFIS. . . . . EMFFHP       | NV | YAD  | GS   | ICLD                      | ILQN. . . . . RWT       |                   |
| <i>Nh Rad6_2</i>     | 47 | PFEDEG    | FRLV      | MFEEQ  | YF  | PNKP     | PQVKFIS. . . . . EMFFHP       | NV | YAN  | GE   | ICLD                      | ILQN. . . . . RWS       |                   |
| <i>Sp Ubc2_2</i>     | 47 | PFEDEG    | FKLV      | LSFDEQ | YF  | PNKP     | PLVKFVS. . . . . TMFFHP       | NV | YAN  | GE   | ICLD                      | ILQN. . . . . RWS       |                   |
| <i>Sc Ubc3_3</i>     | 54 | IYHGGF    | FKAQ      | MRFPED | YF  | PSFP     | PQFRFT. . . . . AIYHP         | NV | YRD  | GR   | ICLS                      | ILHQSG.DPMTDEPDAETWS    |                   |
| <i>Hs Ube2R1_3</i>   | 52 | YIEGGY    | FKAR      | LKFPID | YF  | YSFP     | PAFRFLT. . . . . KMWHHP       | NI | YET  | GD   | ICLS                      | ILHPPVDDPQSGELPSEWRN    |                   |
| <i>Ce Ubc3_3</i>     | 53 | LYQGGY    | FKAS      | IRFPNS | YF  | YSFP     | PSMKFT. . . . . KVVHHP        | NV | YEN  | GD   | ICLS                      | ILHSPIDDPQSGELACERWN    |                   |
| <i>Sc Ubc7_3</i>     | 48 | PYADGV    | FNAK      | LEFPKD | YF  | LSFP     | PKLTFPT. . . . . SILHHP       | NI | YPN  | GE   | ICLS                      | ILHPPGDDPNMYELAEERWN    |                   |
| <i>Mm Ube2G2_3</i>   | 47 | CFEFGV    | FPAI      | LSFFLD | YF  | LSFP     | PKMRFT. . . . . EMFFHP        | NI | YPD  | GR   | ICLS                      | ILHAPGDDPMGYESSAEERWS   |                   |
| <i>Ce Ubc7_3</i>     | 47 | LYEGGF    | FKAI      | LDFFRD | YF  | PKFP     | PKMKFIS. . . . . EIWHHP       | NI | YKE  | GN   | ICLS                      | ILHDPGDDKWGYERPEERWL    |                   |
| <i>Hs Ube2G1_3</i>   | 49 | LYEGGV    | FKAH      | LTFPKD | YF  | LRFP     | PKMKFIT. . . . . EIWHHP       | NV | YKN  | GD   | ICLS                      | ILHEPGDDKYGKPEERWL      |                   |
| <i>Ta Ubc7_3</i>     | 51 | LYDGGY    | FNAI      | MSFPQN | YF  | NSFP     | PTVRFVS. . . . . EMWHHP       | NV | YPD  | GR   | ICLS                      | ILHPPGDDPNMGYELASERWT   |                   |
| <i>Sp Ubc15_3</i>    | 49 | LYEGGV    | FHAT      | LSFPQD | YF  | PLMP     | PKMKFTT. . . . . EIWHHP       | NV | YPN  | GE   | ICLS                      | ILHPPGDDKYGELAEERWL     |                   |
| <i>AsFv ubcB_3</i>   | 44 | LYEGGL    | FKAK      | IVFPFK | YF  | YEEF     | RLTFST. . . . . EMWHHP        | NI | YSD  | GK   | ICLS                      | ILH.G.DNA.EEQGMTWS      |                   |
| <i>Ec Ubc_3</i>      | 50 | PYENGI    | FKGR      | MLFPTD | YF  | DSFP     | PKVRFCS. . . . . KMWHHP       | NI | YEN  | GN   | ICLS                      | ILHNPGEDEBYGYESLGDWRWL  |                   |
| <i>Hs UBE2E1_4</i>   | 45 | VYEGGV    | FFLD      | ITFPE  | YF  | FKFP     | KVTFRT. . . . . RIYHC         | NI | NINS | QVI  | ICLD                      | ILKD. . . . . NWS       |                   |
| <i>Sc Ubc4_4</i>     | 45 | PYAGGV    | FFLS      | IHFPTD | YF  | FKFP     | KISFTT. . . . . KIYHP         | NI | NINA | NG   | ICLD                      | ILKD. . . . . QWS       |                   |
| <i>Ce Ubc2_4</i>     | 44 | PYQGGV    | FFLT      | IHFPTD | YF  | FKFP     | PKVAFPT. . . . . RIYHP        | NI | NINS | NG   | ICLD                      | ILRS. . . . . QWS       |                   |
| <i>Xl Ubc4_4</i>     | 44 | PYQGGV    | FFLT      | IHFPTD | YF  | FKFP     | PKVAFPT. . . . . RIYHP        | NI | NINS | NG   | ICLD                      | ILRS. . . . . QWS       |                   |
| <i>Sc Ubc2D2_4</i>   | 44 | PYQGGV    | FFLT      | IHFPTD | YF  | FKFP     | PKVAFPT. . . . . RIYHP        | NI | NINS | NG   | ICLD                      | ILRS. . . . . QWS       |                   |
| <i>Mm MGC58426_4</i> | 44 | PYQGGV    | FFLS      | VHFNN  | YF  | FKFP     | KVTFIT. . . . . RYVHP         | NI | SK   | NINS | ICLD                      | ILNS. . . . . MWS       |                   |
| <i>Dm CG5440_4</i>   | 48 | VYENGI    | FKLD      | IFFPVE | YF  | FAPF     | PVVFIRT. . . . . PIYHC        | NI | HR   | LF   | ICLD                      | ILKE. . . . . KWS       |                   |
| <i>Dm CG10862_4</i>  | 45 | VYEGGR    | FRVE      | IVFPRN | YF  | PYFP     | PYLAFLT. . . . . KTYHC        | NI | AL   | SG   | ICLD                      | ILGS. . . . . KWS       |                   |
| <i>Dm CG2574_4</i>   | 45 | VYEGGH    | FRLD      | IRFPAS | YF  | FRAP     | PRIRFTT. . . . . RIYHC        | NV | DS   | RGA  | ICLD                      | VLGE. . . . . RWS       |                   |
| <i>Hs UBE2J2_5</i>   | 44 | PYEGGY    | YHGK      | LIFPRE | YF  | FKFP     | PSIYMIT. . . . . PN           | GR | FKCN | TR   | ICLS                      | ITDFHP. . . . . DTWN    |                   |
| <i>Sc Ubc6_5</i>     | 43 | PYKGGY    | YHGT      | LTFPSD | YF  | YKFP     | PAIRMIT. . . . . PN           | GR | FKCN | TR   | ICLS                      | ITDFHP. . . . . DTWN    |                   |
| <i>Ce Ubc15_5</i>    | 44 | PYFGYV    | YHGK      | VIFKEN | YF  | PSFP     | PAITMIT. . . . . PN           | GR | FQTN | TR   | ICLS                      | ITDYHP. . . . . ESWN    |                   |
| <i>Pm Sb55_5</i>     | 44 | PYFAGV    | YHGK      | VIFKPE | YF  | YKFP     | PGISMIT. . . . . PN           | GR | FATH | KR   | ICMS                      | SDYHP. . . . . ETWN     |                   |
| <i>At Ubc32_5</i>    | 46 | EFEGGY    | YHGR      | IQLPAD | YF  | FKFP     | PSMFLT. . . . . PN            | GR | FETN | TK   | ICLS                      | ISNYHP. . . . . EHWQ    |                   |
| <i>Hs UBE2J1_5</i>   | 43 | FDYGGY    | YHGR      | IVLPEE | YF  | PKFP     | PSIILLT. . . . . AN           | GR | FVGN | KI   | ICLS                      | ISGHHHP. . . . . ETWQ   |                   |
| <i>Hs UBE2H_6</i>    | 45 | PYEGGV    | WKVR      | VDLPDK | YF  | PKFS     | PSIGFVN. . . . . KIFHP        | NI | DEAS | GT   | ICLD                      | VINQ. . . . . TWT       |                   |
| <i>Ce Ubc8_6</i>     | 46 | AYENGV    | WRIR      | VDMPDK | YF  | PKFS     | PSIGFLN. . . . . KIFHP        | NI | DEAS | GT   | ICLD                      | VINQ. . . . . AWT       |                   |
| <i>At Ubc6_6</i>     | 43 | LYQGGV    | WKIK      | VELPEA | YF  | PKFS     | PSVGFVN. . . . . KIYHP        | NV | DESS | GA   | ICLD                      | VINQ. . . . . TWS       |                   |
| <i>Sc Ubc8_6</i>     | 43 | PYENGV    | WRLH      | VELPDN | YF  | PKFS     | PSVGFVN. . . . . KIFHP        | NI | DIAS | GS   | ICLD                      | VINS. . . . . TWS       |                   |
| <i>Sp Ubc8_6</i>     | 43 | PYSGIV    | WKVH      | VELPSE | YF  | PWKS     | PSVGFVN. . . . . RIFHP        | NI | DELS | GS   | ICLD                      | VINQ. . . . . TWS       |                   |
| <i>Dm CG14739_6</i>  | 47 | AYEGGI    | WTVN      | VMPQDY | PL  | TAPF     | PRVRFVT. . . . . KILHP        | NI | EFIT | GL   | ICM                       | VNLKQ. . . . . AWS      |                   |
| <i>Sc Ubc9_7</i>     | 52 | NWAGGV    | YPIV      | VEYVNE | YF  | PSKP     | PKVKFPA. . . . . GFYHP        | NV | YPS  | GT   | ICLS                      | ILNED. . . . . QDWR     |                   |
| <i>Mm Ube2I_7</i>    | 52 | PWEGGL    | FKLR      | MLFKDD | YF  | SSFP     | PKCKFEP. . . . . PLFHP        | NV | YPS  | GT   | ICLS                      | ILEED. . . . . KDWR     |                   |
| <i>Hs Ube2I_7</i>    | 52 | PWEGGL    | FKLR      | MLFKDD | YF  | SSFP     | PKCKFEP. . . . . PLFHP        | NV | YPS  | GT   | ICLS                      | ILEED. . . . . KDWR     |                   |
| <i>Sp Ubc9_7</i>     | 52 | SWEGGL    | YKLT      | MAFPPE | YF  | TRFP     | PKCRFT. . . . . PLFHP         | NV | YPS  | GT   | ICLS                      | ILNEE. . . . . EGWR     |                   |
| <i>At AHUS5_7</i>    | 53 | DWEGGV    | FPLT      | MHFSDE | YF  | PSKP     | PKCKFQ. . . . . GFFHP         | NV | YPS  | GT   | ICLS                      | ILNED. . . . . YGWR     |                   |
| <i>Hs Ube2F_8</i>    | 47 | YIQGGK    | QFET      | TEVPDA | YF  | NMVP     | KVKCLT. . . . . KIWHHP        | NI | TE   | TE   | ICLS                      | ILREHSIDG. . . . . TGWA |                   |
| <i>Ce Ubc12_8</i>    | 51 | IYRGGK    | FRFK      | ITVPEE | YF  | NVVP     | PVVKCLT. . . . . KVVHHP       | NI | DE   | GS   | ICLS                      | ILRQNSLDQ. . . . . YGWR |                   |
| <i>Hs Ube2M_8</i>    | 45 | YKSGK     | YVFS      | FKVGGQ | YF  | PHDP     | PKVKCBT. . . . . MYYHP        | NI | IDL  | EG   | ICLS                      | ILNLR. . . . . DWK      |                   |
| <i>Sp Ubc12_8</i>    | 44 | YKGGK     | YKFR      | IQIDDN | YF  | PHDP     | PKVKCLN. . . . . KIYHP        | NI | IDL  | EG   | ICLS                      | ILNLRQ. . . . . DWN     |                   |
| <i>At RCE2_8</i>     | 46 | YVLSGN    | YVFS      | FQVSNM | YF  | HEAP     | KVKCKT. . . . . KVVHP         | NI | IDL  | EG   | ICLS                      | ILNLR. . . . . DWK      |                   |
| <i>Nc Ubc_8</i>      | 45 | MYKGGK    | FSTF      | FNITPN | YF  | HEFP     | PKVQCRE. . . . . KIYHP        | NI | IDL  | EG   | ICLS                      | ILNLR. . . . . DWK      |                   |
| <i>Sc Ubc12_8</i>    | 51 | YVNYGS    | INFN      | LDNFNE | YF  | TEFP     | PKVVKCL. . . . . KIFHP        | NI | IDL  | KG   | ICLS                      | ILNLR. . . . . DWS      |                   |
| <i>Hs UBE2T_9</i>    | 45 | PYKGVG    | FKLE      | VIPER  | YF  | PEFP     | PQIRFLT. . . . . PIYHP        | NI | DS   | AG   | ICLD                      | VLKLPK. . . . . AWR     |                   |
| <i>Sc Ubc13_9</i>    | 46 | PYEDGI    | FLEL      | YLPDD  | YF  | MEAP     | PKVRFLT. . . . . KIYHP        | NI | DR   | LG   | ICLD                      | VLKT. . . . . NWS       |                   |
| <i>Hs UBE2N_9</i>    | 46 | PFEDEG    | FKLE      | LFLPEE | YF  | MAAP     | PKVRFMT. . . . . KIYHP        | NV | DK   | LG   | ICLD                      | ILKD. . . . . KWS       |                   |
| <i>Lm Ubc_9</i>      | 44 | CYEGGL    | FRLE      | LFLPEE | YF  | PKFP     | PKVRFLT. . . . . RIYHP        | NV | DK   | VG   | ICLD                      | ILKD. . . . . KWS       |                   |
| <i>Hs UBE2S_11</i>   | 49 | PYAGGL    | FRMK      | LLGKDF | YF  | ASFP     | PKGYFLT. . . . . KIFHL        | NV | GA   | NG   | ICV                       | NVLK. . . . . RDWT      |                   |
| <i>At UBC22_11</i>   | 49 | PYENGL    | FRMK      | LALSHD | YF  | PHSP     | PKGYFMT. . . . . KIFHP        | NV | AS   | NG   | ICV                       | NVLK. . . . . KDWN      |                   |
| <i>Sc Ubc10_11</i>   | 59 | PYENHQ    | FRIL      | IEVPS  | YF  | MNFP     | PKISFMQN. . . . . NILHC       | NV | KSAT | GE   | ICLN                      | ILKPE. . . . . EWT      |                   |
| <i>Sp Ubc16_11</i>   | 48 | PYEGGW    | VLDI      | IEVHSG | YF  | ISFP     | PSVYFQT. . . . . KIVHP        | NI | SWTN | GE   | ICLN                      | ILKT. . . . . HWS       |                   |
| <i>Sc Ubc11_12</i>   | 45 | PYSGLK    | FKVS      | LKFPQD | YF  | PHFP     | PMIKFLS. . . . . PMWHHP       | NV | DK   | GS   | ICLD                      | ILK. . . . . EKWS       |                   |
| <i>Ss E2C_12</i>     | 44 | VYESLK    | YKLT      | LEFPSD | YF  | YKFP     | PVVKFTT. . . . . PCWHHP       | NV | DK   | GS   | ICLD                      | ILK. . . . . ENWT       |                   |
| <i>Hs UBE2C_12</i>   | 44 | VYEDLR    | YKLS      | LEFPSS | YF  | YNAF     | PTVKFLT. . . . . PCYHP        | NV | DK   | GN   | ICLD                      | ILK. . . . . EKWS       |                   |
| <i>Dm VIHAR_12</i>   | 44 | VYSGTY    | YRSL      | LDFPNS | YF  | YAAF     | PVVKFLT. . . . . SCFHP        | NV | DK   | LG   | ICLD                      | ILK. . . . . DKWS       |                   |
| <i>At Ubc19_12</i>   | 44 | VYEGTY    | YRSL      | LTFSDN | YF  | PKFS     | PKVKFBT. . . . . CCFHP        | NV | DK   | LY   | GN                        | ICLD                    | ILQ. . . . . DKWS |
| <i>Hs UBE2W_13</i>   | 48 | LYAGEK    | FQLL      | FKFSRR | YF  | PDSF     | PQVMFTGEN. . . . . IPVHP      | HV | YS   | NG   | ICLS                      | ILTE. . . . . DWS       |                   |
| <i>Ce Ubc16_13</i>   | 49 | LYAGEV    | FMLQ      | FTFGPQ | YF  | PNSF     | PVEMFVGET. . . . . IPAHP      | HI | YS   | NG   | ICLS                      | ILSD. . . . . DWT       |                   |
| <i>At UBC15_13</i>   | 49 | LYANET    | YQLQ      | VEFPEH | YF  | MEAP     | QVVFVSP. . . . . APSPH        | HI | YS   | NG   | ICLD                      | ILYD. . . . . SWS       |                   |
| <i>Hs BIRC6_14</i>   | 50 | PYANGC    | FEDF      | VYFPQD | YF  | SSFP     | PLVNLETTGGHSVRFNPNLYN         | DK | GV   | ICLS | ILNTWHRPE. . . . . EKWN   |                         |                   |
| <i>Ce Ubc17_14</i>   | 51 | PYANGL    | FEFD      | IFPPTG | YF  | PSFP     | PKCAFLETTGSGNVRFNPNLYN        | DK | GI   | ICLS | ILGTWGRPE. . . . . EKWN   |                         |                   |
| <i>At Ubc23_14</i>   | 47 | PYQDGL    | FFFD      | FHLPSD | YF  | SVFP     | PSAYYHS. . . . . GGWRLNPNLYE  | EG | KV   | ICLS | ILNTWTGRGN. . . . . EVWD  |                         |                   |
| <i>Hs UBE2O_14</i>   | 47 | PYEDGL    | YLFDI     | QLPNI  | YF  | PAVF     | PHFCYLSQ. . . . . CSGRLNPNLYE | NG | KV   | ICLS | ILGTWIGKGT. . . . . ERWT  |                         |                   |
| <i>Dm CG10254_14</i> | 48 | PYQNAL    | FFFD      | FQFRGD | YF  | KSPF     | PVCHYISY. . . . . CTDRLNPNLYE | GR | CV   | ICLS | ILGTWMMGRDN. . . . . EVWS |                         |                   |
| <i>Hs UBE2Z_14</i>   | 48 | PYEGGF    | FLVY      | FRCPD  | YF  | PIHP     | PRVKLMTTGNNTRVRFNPNLYE        | NG | KV   | ICLS | ILGTWTG. . . . . PAWS     |                         |                   |
| <i>Hs UBE2L6_15</i>  | 44 | PYHLKA    | FNLRI     | SFPPE  | YF  | PKFP     | PMIKFTT. . . . . KIYHP        | NV | DE   | NG   | ICLP                      | ILISSE. . . . . NWK     |                   |
| <i>Hs UBE2L3_15</i>  | 45 | PYDKGA    | FRIE      | INFPAE | YF  | PKFP     | PKITFT. . . . . KIYHP         | NI | DE   | KG   | ICLP                      | ILVISA. . . . . NWK     |                   |
| <i>Ce Ubc18_15</i>   | 45 | PYKGA     | FKVG      | ITFPVD | YF  | PKFP     | PKVAFET. . . . . KIYHP        | NV | DE   | EG   | ICLP                      | ILVISA. . . . . NWK     |                   |
| <i>Dm CG17030_15</i> | 50 | PYDKGAY   | KMEI      | DFLFD  | YF  | PKFP     | PRIHINT. . . . . RMYHL        | NV | DE   | RQ   | ICLP                      | ILVE. . . . . HWI       |                   |
| <i>Ce Ubc24_15</i>   | 50 | YLKNI     | MTLT      | LDVNE  | YF  | PKFP     | PYLKFC. . . . . NYVHP         | NV | DV   | TE   | ICLS                      | ILMQLQE. . . . . NWK    |                   |
| <i>Dm UbcD84_15</i>  | 45 | PYKGA     | FRIE      | INFPQ  | YF  | PMPF     | KILFKT. . . . . KIYHP         | NV | DE   | KG   | ICLP                      | ILISTD. . . . . NWK     |                   |

| Sc Ubc1_1     | TT  | α2                                                                      | TT | α3        | α4              |
|---------------|-----|-------------------------------------------------------------------------|----|-----------|-----------------|
|               |     | 0000000000.000                                                          |    | 000000000 | 000000000000000 |
| Sc Ubc1_1     | 98  | PVIT.LKSAALISIQAL.LQSP..EPNDPQDAEVAQHYLR...D....RESFNKTALWTRLYAS..      |    |           |                 |
| Sp Ubc1_1     | 99  | PVYT.MKSAALISIQS.LLCTP..EPSNPQDAQVAQVYLQ...N....YQQFVRTAREWTSYAA..      |    |           |                 |
| Hs UBE2K_1    | 102 | AAMT.LRTVLLSIQA.LLAAA..EPDDPQDAVANQYKQ...N....PEMFKQTAARLWAHVYAG..      |    |           |                 |
| Os Ubc_1      | 99  | PALT.LKTAALLSIQA.LLSAP..APDDPQDAVAQQYLR...D....YSTFSATAARYWTEAFAK..     |    |           |                 |
| Ce Ubc20_1    | 102 | ASLT.LRTVLLSIQA.LMCTP..EPKDPQDAVAKQYME...K....PAVFKATAEYWTTKFAK..       |    |           |                 |
| Ce Ubc1_2     | 98  | PTYD.VAAIILTSIQS.LLDEP..NPNSPANSLAAQLYQE...N....RREYEKRVQQIIVEQSWLNF    |    |           |                 |
| Hs UBE2A_2    | 98  | PTYD.VSSIILTSIQS.LLDEP..NPNSPANSPAAQLYQE...N....KREYEKRVSAIVEQSWRDC     |    |           |                 |
| Dm UbcD6_2    | 98  | PTYD.VSAIILTSIQS.LLSDP..NPNSPANSTAAQLYKE...N....RREYEKRVKACVEQSFID..    |    |           |                 |
| At Ubc1_2     | 98  | PIYD.VAAIILTSIQS.LLCDP..NPNSPANSEARMYSE...S....KREYNRRVRDVEEQSWTAD      |    |           |                 |
| At Ubc3_2     | 98  | PIYD.VAAVILTSIQS.LLCDP..NPDSPANAEARLFSE...N....KREYNRRVTEIVEQSVV..      |    |           |                 |
| Sc Ubc2_2     | 98  | PTYD.VASAILTSIQS.LFNPD..NPASPANVEAATLFKD...H....KSQYVKKVETVEKSWEDD      |    |           |                 |
| Nh Rad6_2     | 98  | PTYD.VAAVILTSIQS.LLNDP..NTGSPANVEASNLYKD...N....RKEYTKRVRETVEKSWED.     |    |           |                 |
| Sp Ubc2_2     | 98  | PTYD.VAAIILTSIQS.LLNDP..NNASPANAEAAQLHRE...N....KKEYVRRVRKTVEDSWES..    |    |           |                 |
| Sc Ubc3_3     | 117 | PVQT.VESVLLSIVS.LLEDP..NINSPANVDAAVDYRK...N....PEQYKQVRKMEVEERSKQD..    |    |           |                 |
| Hs Ube2R1_3   | 116 | PTQN.VRTILLSVIS.LLNEP..NTFSPANVDASVMYRK..WKESKGDREYTDIIRKQVLGTYKVD..    |    |           |                 |
| Ce Ubc3_3     | 117 | PTQS.VRTILLSVIS.LLNEP..NTSSPANVDASVMYRK..WKEDQ..DPEYAKIVTKQVEESKQV..    |    |           |                 |
| Sc Ubc7_3     | 112 | PVQS.VEKILLSVMS.MLSEP..NIESGANIDACILWRD...N....RPEFKRVRKLSILKSLGF..     |    |           |                 |
| Mm Ube2G2_3   | 111 | PVQS.VEKILLSVVS.MLSEP..NDESANVDASKMWRD...D....REQFYKIKQIQVQKSLGL..      |    |           |                 |
| Ce Ubc7_3     | 111 | PVHT.VETILLSVIS.MLTDI..NFSPANVDAAKMQRE...N....YAEFKKKVQAQVRRSQEE..      |    |           |                 |
| Hs Ube2G1_3   | 113 | PIHT.VETIMLSVIS.MLADP..NGDSPANVDAKEWRE...N....NGEFKRVKACVRRSQEFT..      |    |           |                 |
| Ta Ubc7_3     | 114 | PVHT.VESIVLSVIS.MLSSP..NDESANIEAAKDWRE...K....QDEFKRVKRAVRRSQEEM..      |    |           |                 |
| Sp Ubc15_3    | 113 | PVHS.PETILLSVIS.MLSSP..NDESANIDAAKEFRE...N....PQEFKRVKRLVRRSQIEM..      |    |           |                 |
| AsFv ubcB_3   | 103 | PAKQ.IDTVLLSVIS.LLNEP..NPDSPANVDAKSYRKYLYKEDL...ESYPMEVKTVKTKSLDE..     |    |           |                 |
| Ec Ubc_3      | 114 | PVRT.PESVILSIIT.LLTSI..NCESPANVDAQHLRE...N....EREYRKKVMELAAMTLDL..      |    |           |                 |
| Hs UBE2E1_4   | 96  | PALT.ISKVLLSIQS.LLTDI..NPADPLVGSIAATQYMT...N....RAEHDRMARQWTKRYAT..     |    |           |                 |
| Sc Ubc4_4     | 96  | PALT.ISKVLLSIQS.LLTDI..NPDDPLVPEIAHIYKT...D....RPKYEATAREWTKKYAV..      |    |           |                 |
| Ce Ubc2_4     | 95  | PALT.ISKVLLSIQS.LLCDP..NPDDPLVPEIARIYKT...D....RERYNQLAREWTKKYAM..      |    |           |                 |
| Xl Ubc4_4     | 95  | PALT.ISKVLLSIQS.LLCDP..NPDDPLVPEIARIYKT...D....REKYNRIAREWTKKYAM..      |    |           |                 |
| Hs Ubc2D2_4   | 95  | PALT.ISKVLLSIQS.LLCDP..NPDDPLVPEIARIYKT...D....REKYNRIAREWTKKYAM..      |    |           |                 |
| Mm MGC58426_4 | 95  | PALT.ISKVLLSIQS.LLCDP..NPDDPLVPEIAKVYRK...D....LREYNRLAREWTKKYAM..      |    |           |                 |
| Dm CG5440_4   | 99  | PALT.ISKVLLSIQS.LLTDI..NPDKPLMAKIGTEYLR...N....RAEHDKARLWTKRYA...E..    |    |           |                 |
| Dm CG10862_4  | 96  | PALS.VSKVLLSIQS.LLADP..NPHDPMEVSAVDVFKG...N....RALHDKNARLWTKKYAK..      |    |           |                 |
| Dm CG2574_4   | 96  | PVMN.VAKVLLSIYV.LMSEC..NPDDPLVMCIADQYKT...N....RREHDKIARHWTKLFAM..      |    |           |                 |
| Hs UBE2J2_5   | 96  | PAWS.VSTILLGLLS..FMVE..KGPTLGSIEI...D....SDFTKRLQAVQS...E..             |    |           |                 |
| Sc Ubc6_5     | 95  | PGWS.VSTILLGLLS..FMFS..DEATGSIT...D....SDHQKKTFLARNS...E..              |    |           |                 |
| Ce Ubc15_5    | 96  | PGWT.VSAILGLLS..FMNE..NSPAAGSIAG...D....TPQDQRMVAAAS...E..              |    |           |                 |
| Pm Sb55_5     | 96  | PMWS.VSILLGLLS..FMMD..NSPTTGSVST...D....TVADKORLAKAS...E..              |    |           |                 |
| At Ubc32_5    | 98  | PSWS.VRTALVALIA..FMPT.SPNGALGSDY...D....PKDERRTLAIKS...E..              |    |           |                 |
| Hs UBE2J1_5   | 95  | PSWS.VRTALLAIG..FMPT.KGEGAGISLDY...D....TPEERRALAKKSQDF...E..           |    |           |                 |
| Hs UBE2H_6    | 97  | ALYD.LTNIFEFSLPQLLAYP..NPIDPLNGDAAMYHL...R....PEEYKQKIKKEYIQKYAT..      |    |           |                 |
| Ce Ubc8_6     | 98  | ALYD.LTNIFDFLPQLLYP..NAADPLNGEARLYIH...K....PEEYRRTCREYVMRFASEH         |    |           |                 |
| At Ubc6_6     | 95  | PMFD.LINVFESFLPQLLYP..NPSDFPNGEAASLLMR...D....RAAYELKIKVEYCEKYATP..     |    |           |                 |
| Sc Ubc8_6     | 95  | PLYD.LINIVEMIPGLLKEP..NGSDPLNKEAATLQLR...D....KKLYEEKIKKEYIDKYATKE      |    |           |                 |
| Sp Ubc8_6     | 95  | PMFD.MINIFEVFLPQLLYP..NASDPLNGEAALLLR...E....PNTYYAKVRDYIARYA...E..     |    |           |                 |
| Dm CG14739_6  | 99  | SSYD.LVNIFFETFLPQLLYP..NPHDSLNRHAAIMKH...S....EQLFREHVTLLCMKTYAMPA      |    |           |                 |
| Sc Ubc9_7     | 105 | PAIT.LKQIVLVGVD.LLDSI..NPNSPAQEAARWSFSR...N....KAEYDKKIKLQAKQYSK..      |    |           |                 |
| Mm Ube2I_7    | 105 | PAIT.IKQILLGIQE.LLNEP..NIQDPAQAEAYTIYCY...N....RVEYEKRVRAQAKKFAPS..     |    |           |                 |
| Hs Ube2I_7    | 105 | PAIT.IKQILLGIQE.LLNEP..NIQDPAQAEAYTIYCY...N....RVEYEKRVRAQAKKFAPS..     |    |           |                 |
| Sp Ubc9_7     | 105 | PAIT.IKQILLGIQE.LLDDI..NIASPAQTEAYTMFKK...D....KVEYEKRVRAQARENAP..      |    |           |                 |
| At AHUS5_7    | 106 | PAIT.VKQILVGIQE.LLDTI..NPADPAQTEGYHLFCQ...D....PVEYKRVKQLSQKYPALV       |    |           |                 |
| Hs Ube2F_8    | 104 | PTRT.LKDVVVGLNS.LFTDLN.FNDDPLNIEAEHHLR...D....KEDFRNKVEDDIKRYAR...E..   |    |           |                 |
| Ce Ubc12_8    | 108 | PTRN.LTDVVHGLVS.LFNLDL.DFNDAALNIEAAQMQWS...N....RESFNRRVREYISRYC...E..  |    |           |                 |
| Hs Ube2M_8    | 96  | PVLT.LNSIVGLQY.LFLSP..NPEDPLNKEAAEVLQN...N....RRLFEQNVQRSMRGGYIG..      |    |           |                 |
| Sp Ubc12_8    | 95  | PVLN.LNSIVGLQF.LFLSP..NAEDPLNKEAADLHK...D....PQGFASRVRTAMGGGLVQ..       |    |           |                 |
| At RCE2_8     | 97  | PVLN.INTVIYGLFH.LFTEP..NYEDPLNKEAAAVLRD...N....PKTFEYNVRRAMGGGVQ..      |    |           |                 |
| Nc Ubc_8      | 96  | PVLN.LNAVIVGLQF.LFLSP..NASDPLNKEAAEDLRS...N....REGFKRNVRTAMSGGTVK..     |    |           |                 |
| Sc Ubc12_8    | 102 | PALD.LQSIITGLFL.FLFLP..NPNDPLNKDAKLLCE...G....EKFAEAVRLTMSGGSTB..       |    |           |                 |
| Hs UBE2T_9    | 100 | PSLN.IATVLLSIQL.LMSEP..NPDDPLNADISSEFKY...N....KPAFLKNARQWTEKHARQK..    |    |           |                 |
| Sc Ubc13_9    | 97  | PALQ.IRTVLLSIQA.LLSAP..NPNDPLANDVAEDWIK...N....EQGAKAKAREWTKLYAK..      |    |           |                 |
| Hs UBE2N_9    | 97  | PALQ.IRTVLLSIQA.LLSAP..NPDDPLANDVAEQWKT...N....EAQAIETARAWTKLYAM..      |    |           |                 |
| Lm Ubc_9      | 95  | PALL.INKVLLSIQI.LMSSP..NPDDPLANDVAEHWKE...D....EASALQTAREWTRKYAK..      |    |           |                 |
| Hs UBE2S_11   | 100 | AELG.IRHVLLTIR.LLIHP..NPESALNEEAGRLLLE...N....SEEYAAARALLTEIHGG...E..   |    |           |                 |
| At UBC22_11   | 100 | PSLG.LRHVLSVVR.LLIEP..FPESALNEOAGKMLLE...N....YDEYARHARLYTGIHAK...E..   |    |           |                 |
| Sc Ubc10_11   | 113 | PVWD.LLHCVHVAWR.LLREP..VCDSPLDVDIGNIRCG...D....MSAYQGIKVFYLAERER...E..  |    |           |                 |
| Sp UBC16_11   | 100 | PAWS.LQSAALAIIS.LLSNY..DASSPLNVDAAKLLRTG...D....KTAYNSLVRCCTTYLYAK..    |    |           |                 |
| Sc Ubc11_12   | 96  | AVYN.VETILLSIQS.LLGEI..NNSRPLNAVAELWDA...D....MEEYRKKVLACYEEIDD...E..   |    |           |                 |
| Ss E2C_12     | 95  | ASYD.VRTILLSIQS.LLGEI..NNSRPLNAVAADMWS...N....QTEYKVVLEHYKYTAQS...E..   |    |           |                 |
| Hs UBE2C_12   | 95  | ALYD.VRTILLSIQS.LLGEI..NIDSPLNTHAAELWK...N....PTAFKKVLEQTYKQVFT...E..   |    |           |                 |
| Dm VIHAR_12   | 95  | ALYD.VRTILLSIQS.LLGEI..NNSRPLNAOAMMWN...D....QKEYKVVLDAFYEKHKD...E..    |    |           |                 |
| At Ubc19_12   | 95  | SAYD.VRTILLSIQS.LLGEI..NISSPLNNOAQLWS...N....QEEYRKKVVKLYKPLNA...E..    |    |           |                 |
| Hs UBE2W_13   | 101 | PALS.VQSVCLSIIS.MLSSK.EKRHPDNDIYVVRTCN...D....KNPKKTKWVYHDDTV...E..     |    |           |                 |
| Ce Ubc16_13   | 102 | PALS.VQSVCLSIIS.MLSSK.EKHPIDDAIYVRTCS...D....KNPSKTRWVYHDDTV...E..      |    |           |                 |
| At UBC15_13   | 101 | PAMT.VNSVCLSIIS.MLSSP.AKQRPADNDRYVKNCKN...D....GRSPKETRWVYHDDTV...E..   |    |           |                 |
| Hs BIRC6_14   | 113 | PQTS.FLQVLSVQSLI.LVAEP.YFNEPGYERSGTSPGT.QS...SREYDGNIRQATVQWAM...E..    |    |           |                 |
| Ce Ubc17_14   | 114 | PYCS.LMQVLSIQEVI.EKHLWLKREAILK.QAQAWID..NV...SNDFGDDKMSKRKDVFA...E..    |    |           |                 |
| At Ubc23_14   | 107 | PKSS.LLQVLSIQGLI.LVNEP.YFNEAGYDKQVGTAEGE.KN...SLGYNENVTLLNCKTMM...E..   |    |           |                 |
| Hs UBE2O_14   | 108 | SKSS.LLQVLSIQGLI.LVNEP.YFNEAGYDKQVGTAEGE.KN...SRCYNEMALIRVVQSMT...E..   |    |           |                 |
| Dm CG10254_14 | 109 | PSST.MLQVLSIQGLI.LVDEP.YFNEAGYDKQVGTAEGE.KN...SRVYNEMAIKIAQSTV...E..    |    |           |                 |
| Hs UBE2Z_14   | 108 | PAQS.ISSVLSIQSLM.TENP.YHNEPGFERHPG...D....SKNYNECIRHETIRVAV...E..       |    |           |                 |
| Hs UBE2L6_15  | 96  | PCTK.TCQVLEALNV.LVNRV..NIREPLRMDLADLLTQ...N....PELFRKNABEFTLRFGVD...E.. |    |           |                 |
| Hs UBE2L3_15  | 97  | PATK.TDQVILQSLIA.LVNDP..QPEHPLRADLAEYSK...D....RKKFKCNABEFTTKYGE...E..  |    |           |                 |
| Ce Ubc18_15   | 97  | PATK.TEQVMMALLS.LINEP..EHSPIRADVAEEFQK...D....HKKFMKNAEHTTRKHAB...E..   |    |           |                 |
| Dm CG17030_15 | 102 | PTTR.IDQVQLVLLA.TINDP..QPENAWHIEMAGEYRN...D....PVRFFMKDAWVQKYS...E..    |    |           |                 |
| Ce Ubc24_15   | 103 | PETT.MEDVLLNLIIV.LLNEP..DLSRPNVIDAAHDYIH...N....KVEFFKKSSTELAKKW...E..  |    |           |                 |
| Dm UbcD84_15  | 97  | PTTR.TEQVLOALVA.IVHNP..EPEHPLRSDLAEFVVR...E....HKKFMKTAEBFTTKNAB...E..  |    |           |                 |

**Figure S2. Proteins of the E2 superfamily that only conserve the E2 fold but do not conserve the catalytic cysteine do not show a conserved CES/D site.** An extract of the multiple sequence alignment of UEVs E2 families (family 10 and 16) with Ubc2 (Rad6) of family 2 (a serine at the CES/D site in bold) and Ubc1 of family 1 (a aspartate at the CES/D site in bold) as a reference.

```

Sc_Ubc2_2      -----ASPANVEAATLFKDHKSQYVKRVKETVE
Sc_Ubc1_1      -----NDPQDAEVAQHYLRDRESFNKTAALWTR
Hs_UBE2V1_10   ---LMMSKENMKLPQ--PPEGQCYSN-----
Hs_UBE2V2_10   ---LMMSKENMKLPQ--PPEGQTYNN-----
Mm_UBE2V1_10   ---LMMSKENMKLPQ--PPEGQCYSN-----
Mm_UBE2V2_10   ---LMMSKENMKLPQ--PPEGQTYNN-----
Dm_Uev1A_10    ---IMTMKENLKLAQ--PPEGSCF-----
Ce_Uev1_10     ---MMMAKENLKLQQ--PAEGAMF-----
Sc_MMS2_10     ---EMATPANKKLRQ--PKEGETF-----
Sp_MMS2_10     ---EMASSNRKLPQ--PPEGSTFF-----
At_Uev1C_10    ---EMAASHNRKLVQ--PPEG-TFF-----
Hs_AKTIP_16    VVDSVKVCTARLFDQ--PKIEDPYAISFSPWNP
Mm_AKTIP_16    VVDSVKVCTARLFDQ--PKIEDPYAISFSPWNP
Dm_AKTIP2_16   VQEQAILSRNLIYDR--PPTEDPHYIIVEPYCA
Dm_AKTIP1_16   VQENIKESKEHIFDT--PPTEDPHYIVFEKFQQ
Ce_Ubc19_16    AKECVEASRSMVYDELAEQEHDPNGIRLLPWDA
At_ELCL_16     SAREVETEGLLSLQSDLKRREEEINNGFKEMVI

```

**Figure S3. Multiple sequence alignment by ClustalW to define the corresponding residues of the different E2 enzymes for PCA analysis.**

```

hHR6A      MSTPARRRLMRDFKRLQEDPPAGVSGAPSEN-----NIMVWNAVIFGPEGTPFEDGTFKL 55
hHR6B      MSTPARRRLMRDFKRLQEDPPVGVSGAPSEN-----NIMQWNAVIFGPEGTPFEDGTFKL 55
RAD6       -STPARRRLMRDFKRMKEDAPPGVSASPLPD-----NVMVWNAMIIGPADTPYEDGTFRL 54
UBE2I      MSGIALSRLAQERKAWRKDHPFGFVAVPTKNPDGTMNLMNWECAIPGKKGTPWEGGLFKL 60
UBC1       ---SRAKRIMKEIQAVKDDPAAHITLFFVSES----DIHHLKGTFLGPPGTPYEGGKFVV 53
          *:  ::  :  :.* . .      :      ::  :  : *  .**:*.* * :

hHR6A      TIEFTEEYPNKPPTVRFVSKMFHPNVY-ADGSICLDILQN--RWSPTYDVSSILTSIQSL 112
hHR6B      VIEFSEEYPNKPPTVRFVSKMFHPNVY-ADGSICLDILQN--RWSPTYDVSSILTSIQSL 112
RAD6       LLEFDEEYPNKPPHVKFLSEMFHPNVY-ANGEICLDILQN--RWTPTYDVASILTSIQSL 111
UBE2I      RMLFKDDYPSSPPKCKFEPPLFHPNVY-PSGTVCLSILEEDKDWRPATIKQILLGIQEL 119
UBC1       DIEVPMIEYPFKPPKMQFDTKVYHPNISSVTGAICLDILKN--AWSPVITLKSALISLQAL 111
          : .  :** .** :* . ::**:  * :**.**:  * *.  : . * .:** *

hHR6A      LDEFNPNSPANSQAAQLYQENKREYEKRVSAIVEQSWRDC-- 152
hHR6B      LDEFNPNSPANSQAAQLYQENKREYEKRVSAIVEQSWNDS-- 152
RAD6       FNDNPASPANVEAATLFDKHSQYVKRVKQETVEKSWEDDMD 153
UBE2I      LNEFNIQDPAQAEAYTIYCQNRVEYEKRVRAQAKKFAPS--- 158
UBC1       LQSFEPNDFQDAEVAQHYLRDRESFNKTAALWTRLYAS---- 149
          :.*:  .* : :.  :  :. :. * .  .

```

~

**Figure S4. Snapshots from the MD simulations of the wild type, mutant and phosphorylated Ube2I-RanGAP1 complexes.** In all the structures, the residue at the 127 site (CES/D site) is shown on the left, the catalytic cysteine in yellow, and the Glu98 on the right. RanGAP1 and the E2 enzyme are shown as grey and pink cartoons, respectively. The Ube2I<sub>D127A</sub>-RanGAP1 is not reported here since it provides results similar to the Ube2I<sub>D127T</sub>-RanGAP1 simulation.

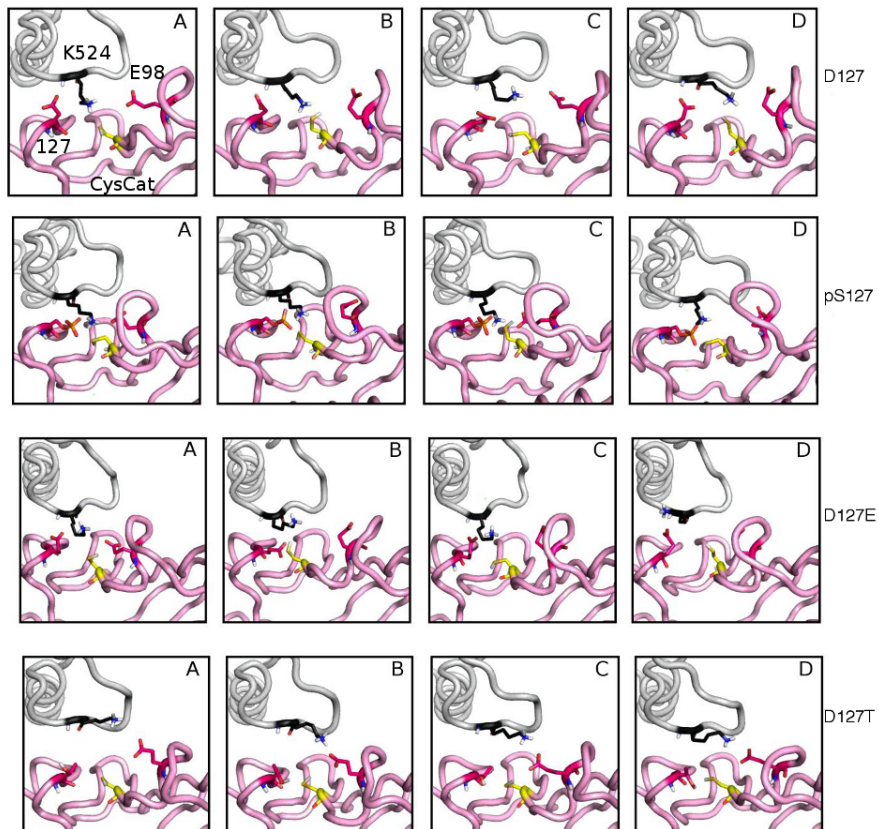

**Figure S5. Main-chain RMSD over the simulation time of each hHR6A MD replicates reported in Table S2. A) wild-type hHR6A B) S120A hHR6A C) S120D hHR6A D) pS120 hHR6A E) S120E hHR6A F) S120T hHR6A**

**A**

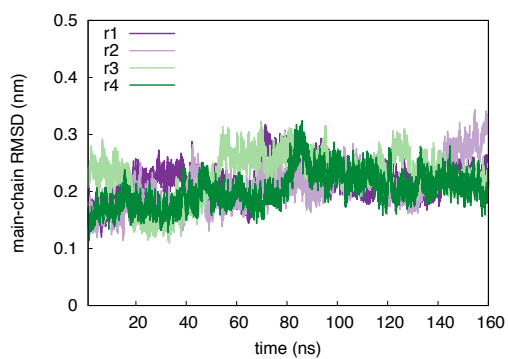

**B**

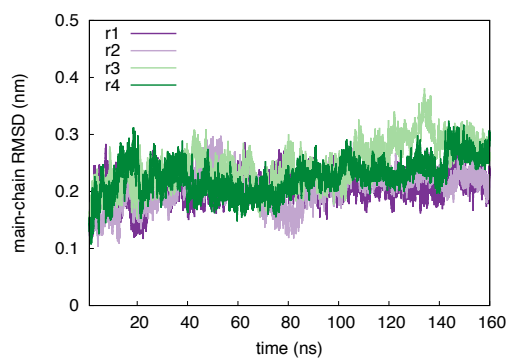

**C**

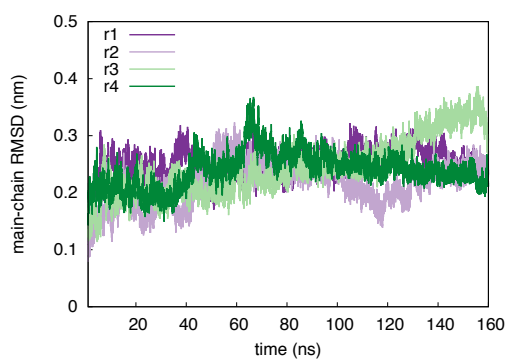

**D**

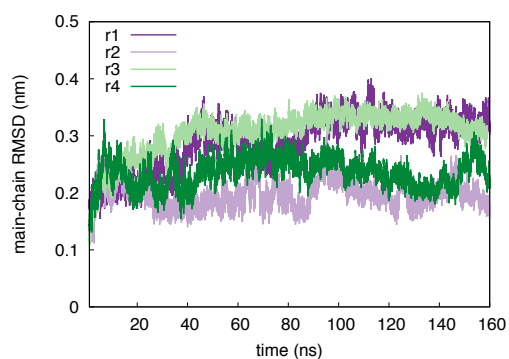

**E**

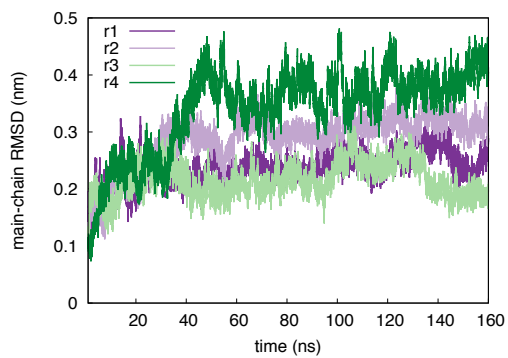

**F**

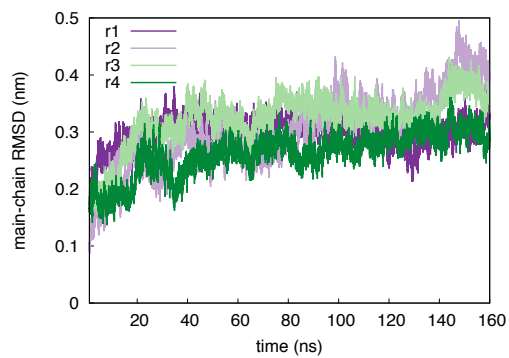

**Figure S6. Main-chain RMSD over the simulation time of each Rad6, hHR6B, Ubc1 and Ube2I MD replicates reported in Table S2. A) wild-type Rad6 B) S120A Rad6 C) S120D Rad6 D) pS120 Rad6 E) hHR6B F) Ubc1 G) Ube2I**

**A**

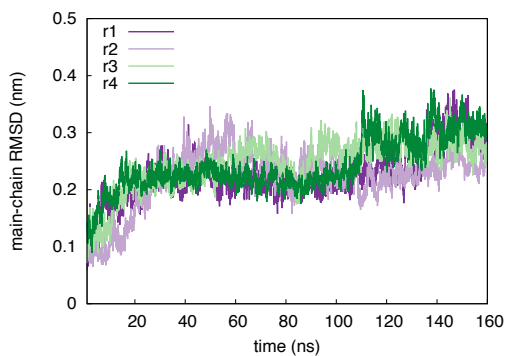

**B**

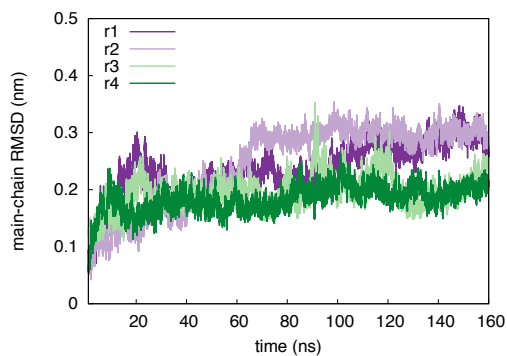

**C**

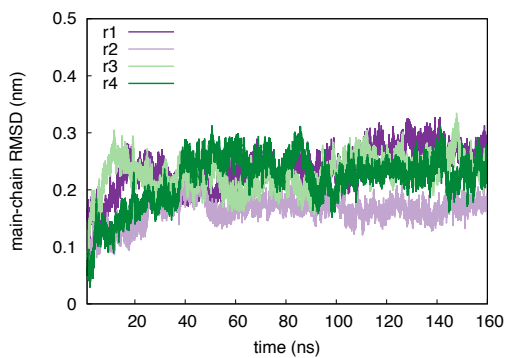

**D**

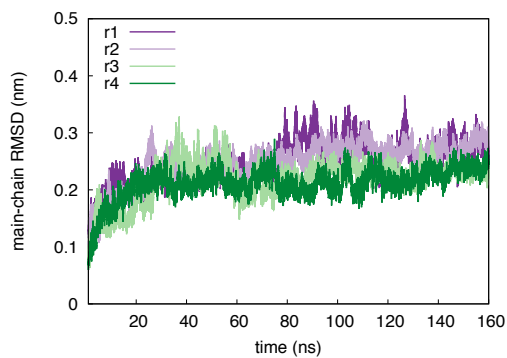

**E**

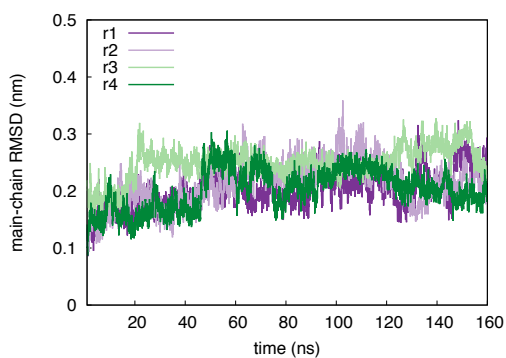

**F**

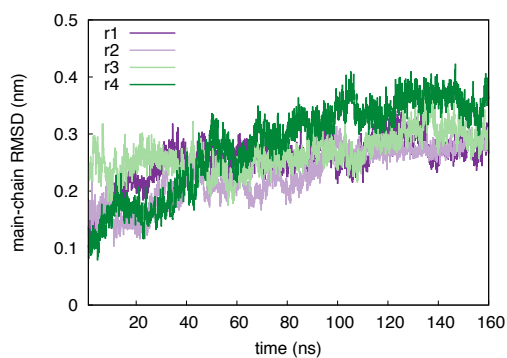



**G**

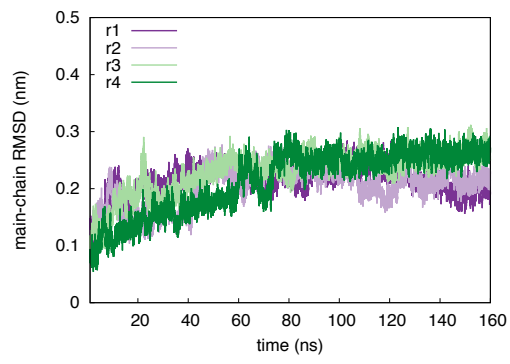

**Figure S7. Main-chain RMSD over the simulation time of each Ube2I-RanGap1 MD replicates reported in Table S2.** A) wild-type complex B) D127A complex C) D127S complex D) pS127 complex E) D127E complex F) D127T complex. We should notice that in these simulations most of the complex residues have been restrained at their atomic positions using and harmonical potential (see Methods).

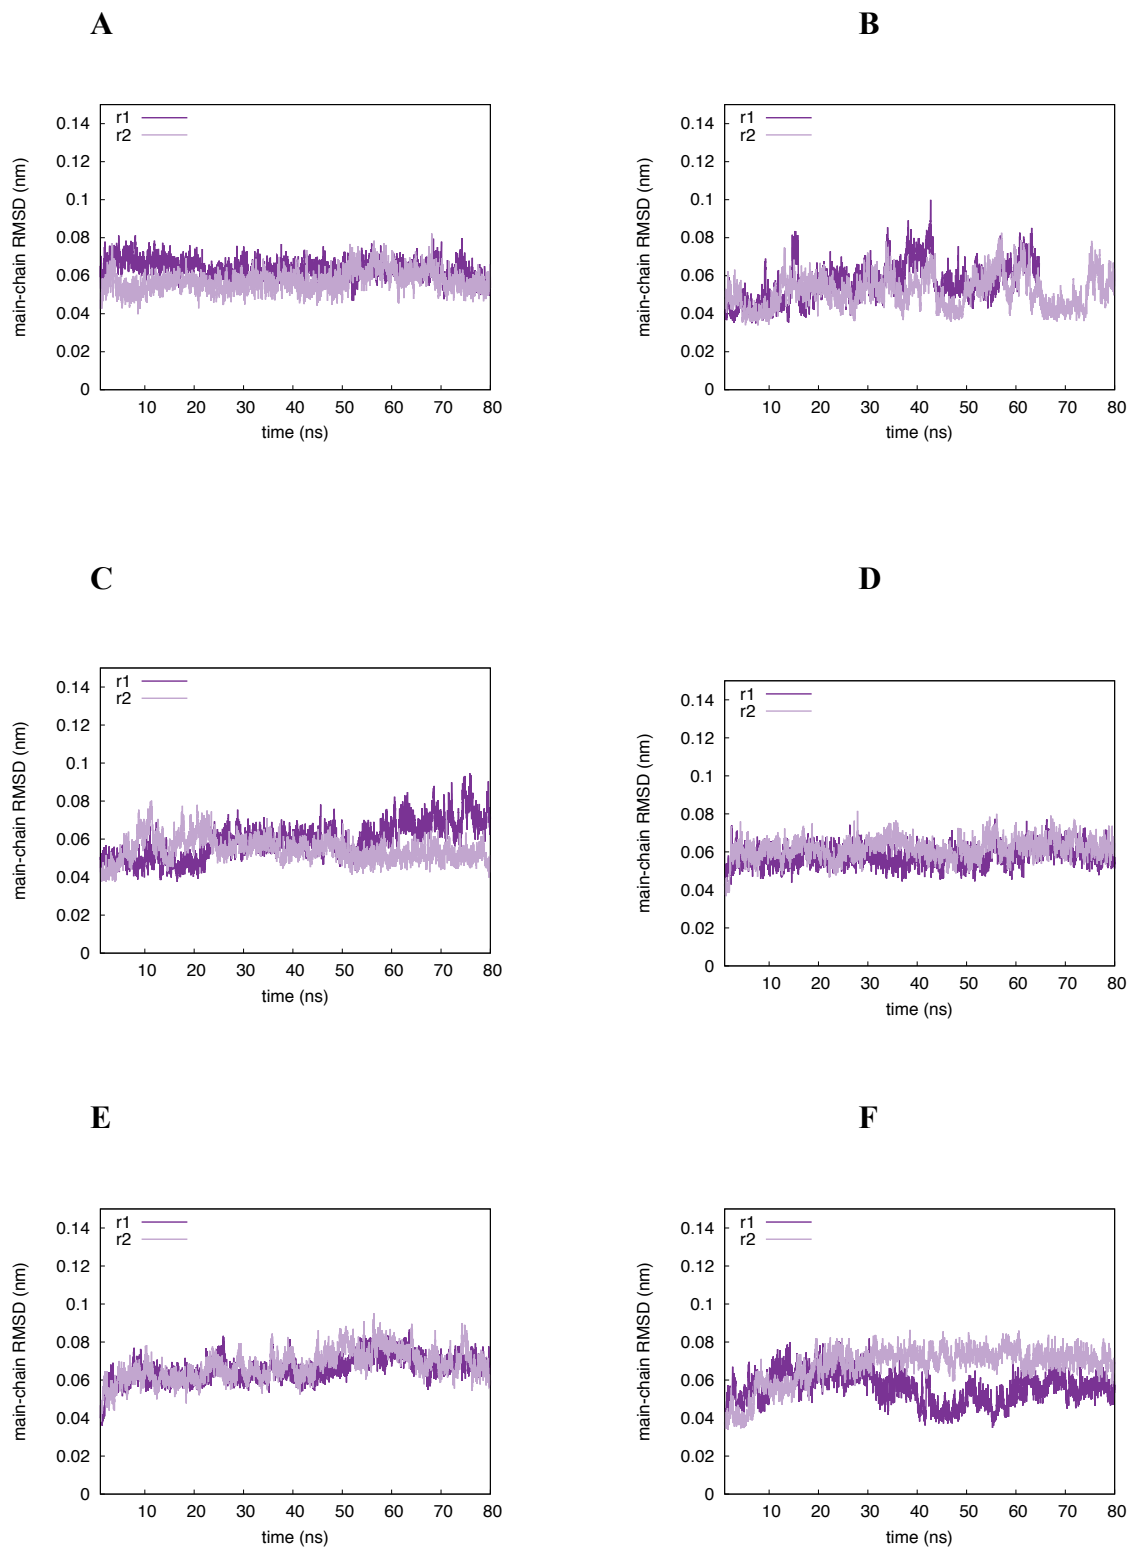

Supplement: srep14849-s1.pdf [file srep14849-s1.pdf]
